# Supplementary material for: Synthesis of silicon complexes from rice husk derived silica nanoparticles
Source: Royal Society of Chemistry journal article supplement (doi:10.1039/c2ra20986a), 2012-01-01
Supplement: c2ra20986a.pdf [file c2ra20986a.pdf]

## *Supporting Information*

### **Synthesis of Silicon Complexes from Rice Husk Derived Silica Nanoparticles**

Weixing Wang,<sup>1,\*</sup> Jarett C. Martin,<sup>2</sup> Rongcai Huang,<sup>2</sup> Wenxi Huang,<sup>1</sup> Anhua Liu,<sup>3</sup> Aijie Han,<sup>4</sup>  
Luyi Sun,<sup>2,\*</sup>

<sup>1</sup>Ministry of Education Key Laboratory of Enhanced Heat Transfer & Energy Conservation,  
School of Chemistry and Chemical Engineering, South China University of Technology,  
Guangzhou, China 510640

<sup>2</sup>Department of Chemistry and Biochemistry & Materials Science, Engineering, and  
Commercialization Program, Texas State University–San Marcos, San Marcos, TX 78666

<sup>3</sup>School of Materials Science and Engineering, South China University of Technology,  
Guangzhou, China 510640

<sup>4</sup>Department of Chemistry, The University of Texas-Pan American, Edinburg, TX 78539-2999

\*Authors to whom correspondence should be addressed:

Dr. Weixing Wang, Tel: 8620-22236985; Fax: 8620-22236985; Email: [cwxwang@scut.edu.cn](mailto:cwxwang@scut.edu.cn)

Dr. Luyi Sun, Tel: (512) 245-5563; Fax: (512) 245-2374; Email: [luyi.sun@txstate.edu](mailto:luyi.sun@txstate.edu)

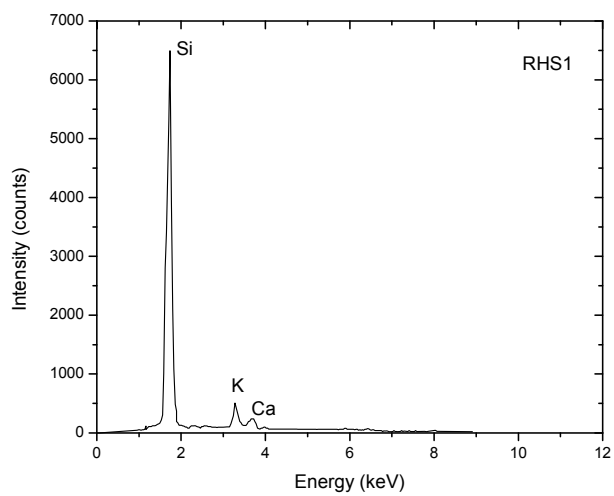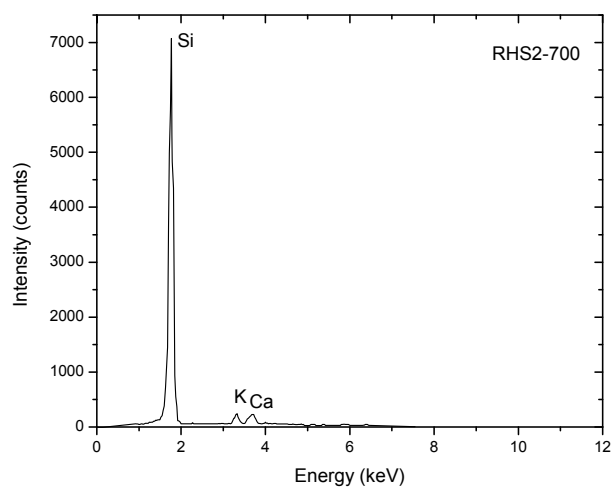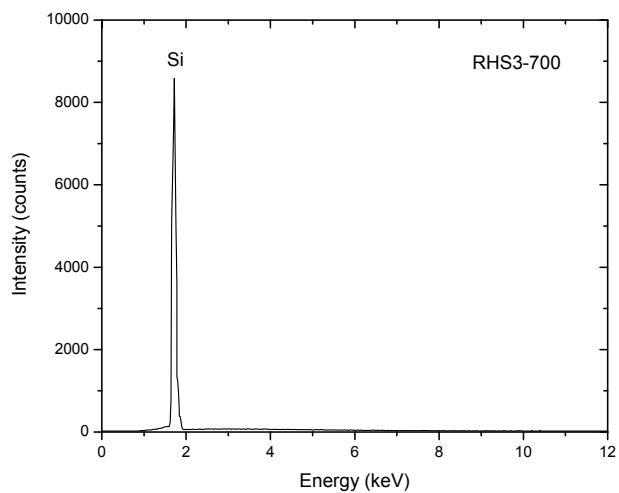

Figure S1. EDS spectra of RH silica samples.

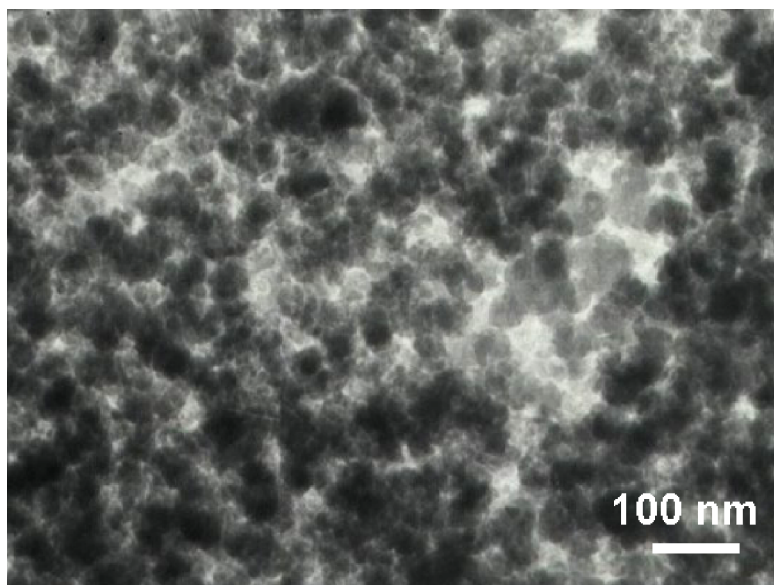

Figure S2. TEM image of RHS3-700 sample.

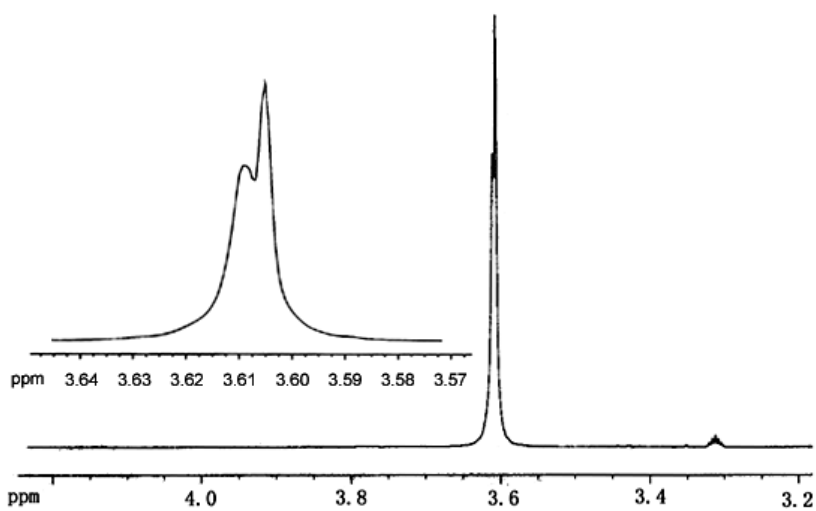

Figure S3. <sup>1</sup>H NMR spectra of KSi(OCH<sub>2</sub>CH<sub>2</sub>O)<sub>2</sub>OCH<sub>2</sub>CH<sub>2</sub>OH (dissolved in CD<sub>3</sub>OD) from RHS3-700.
